# Supplementary material for: Get Set or Get Distracted? Disentangling Content-Priming and Attention-Catching Effects of Background Lure Stimuli on Identifying Targets in Two Simultaneously Presented Series
Source: MDPI journal article supplement (doi:10.3390/brainsci9120365), 2019-12-11
Supplement: s1 [file s1]

**Table S1.** Percentages of trials with correctly identified targets.

|                                 | Target: Left |                |                | Target: Right  |                |                |
|---------------------------------|--------------|----------------|----------------|----------------|----------------|----------------|
|                                 | T1–T2 Lag    | 1              | 3              | 3              | 1              | 3              |
|                                 | T1&T2 Side   | diff           | same           | diff           | diff           | same           |
| T1                              |              |                |                |                |                |                |
| no lures                        |              | 80.9<br>(10.2) | 85.1<br>(11.7) | 82.6<br>(11.4) | 83.3<br>(10.8) | 89.9<br>(10.7) |
| digit lures, same side as T2    |              | 77.0<br>(12.3) | 82.2<br>(16.3) | 82.0<br>(13.0) | 85.2<br>(12.5) | 79.9<br>(10.6) |
| digit lures, other side than T2 |              | 84.7<br>(10.2) | 83.3<br>(11.3) | 82.0<br>(13.9) | 83.1<br>(12.8) | 87.2<br>(10.7) |
| color lures, same side as T2    |              | 82.8<br>(14.6) | 84.3<br>(14.3) | 84.8<br>(12.3) | 81.8<br>(11.8) | 76.8<br>(14.9) |
| color lures, other side than T2 |              | 81.7<br>(16.0) | 76.8<br>(19.1) | 81.1<br>(11.0) | 81.6<br>(12.5) | 81.0<br>(14.3) |
| T2                              |              |                |                |                |                |                |
| no lures                        |              | 57.8<br>(24.3) | 75.3<br>(15.0) | 66.5<br>(19.7) | 46.8<br>(22.7) | 67.5<br>(20.3) |
| digit lures, same side as T2    |              | 55.9<br>(20.9) | 60.4<br>(19.5) | 65.9<br>(17.7) | 47.9<br>(18.4) | 64.3<br>(18.0) |
| digit lures, other side than T2 |              | 65.8<br>(16.3) | 79.8<br>(16.4) | 72.6<br>(19.9) | 48.0<br>(23.0) | 64.9<br>(12.1) |
| color lures, same side as T2    |              | 52.7<br>(28.3) | 63.4<br>(16.2) | 66.7<br>(16.8) | 43.6<br>(17.0) | 62.9<br>(12.8) |
| color lures, other side than T2 |              | 54.0<br>(22.2) | 60.0<br>(16.2) | 63.1<br>(23.5) | 42.6<br>(26.2) | 63.2<br>(18.0) |

The upper half shows T1 values, the lower half T2 values. Values are mean percentages (and standard deviations) across participants. Numbers of trials with correctly identified targets were referred to all trials, both for T1 and T2 (rather than referring T2 to only those trials in which T1 was identified) to have the same scale for lure effects on T1 and on T2.
